# Supplementary material for: Kinetics and mechanism of the sensitized photodegradation of lignin model compounds
Source: Royal Society of Chemistry journal article supplement (doi:10.1039/b416956e), 2005-02-04
Supplement: b416956e.pdf [file b416956e.pdf]

## Kinetics and mechanism of the sensitized photodegradation of lignin model compounds

Ann M. McNally, Emily C. Moody, and Kristopher McNeill\*

Department of Chemistry, University of Minnesota, 207 Pleasant Street SE, Minneapolis, MN, 55455, USA  
E-mail: mcneill@chem.umn.edu; Fax: 612-626-7541; Tel: 612-625-0781

**Supporting Information: Derivation of expression to describe  $k_T$**   
**Sample transient signals obtained by laser flash photolysis**

### Derivation of expression to describe $k_T$

The following scheme was used in the development of an expression to quantify  $k_T$ . The derivation of this expression follows.

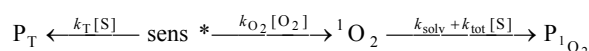

Kinetic model for measuring lignin model compound interaction with triplet sensitizer.  $O_2$  is ground state molecular oxygen,  ${}^1O_2$  is singlet oxygen, S is substrate,  $P_T$  is the product formed through reaction of S and  $\text{sens}^*$  where  $\text{sens}^*$  is excited state sensitizer,  $P_{{}^1O_2}$  is the product formed through reaction of S and  ${}^1O_2$ ,  $k_{O_2}$  is the rate constant for the formation of  ${}^1O_2$  by the interaction of  $O_2$  and excited state sensitizer,  $k_T$  is the rate constant for the interaction of excited state sensitizer with S that results in quenching or reaction,  $k_{\text{solv}}$  is the rate constant for deactivation of  ${}^1O_2$  by solvent,  $k_{\text{tot}}$  is the sum of  $k_{\text{phys}}$ , and  $k_{\text{rxn}}$ , which are the rate constants for physical quenching by S, and chemical reaction with S, respectively.

The differential equation describing the changes in  $[{}^1O_2]$  versus time for this model is given in equation 1.

$$\frac{d[{}^1O_2]}{dt} = k_{O_2}[O_2][\text{sens}^*] - ((k_{\text{solv}} + k_{\text{tot}}[S])[{}^1O_2]) \quad (1)$$

The time-dependent concentration of triplet sensitizer is given by equation 2.

$$[\text{sens}^*]_t = [\text{sens}^*]_0 e^{-(k_{O_2}[O_2] + k_T[S])t} \quad (2)$$

Inserting equation 2 into equation 1, rearranging, and integrating allows one to describe  $[{}^1O_2]$  according to equation 3.<sup>1</sup>

$$[{}^1O_2] = \frac{[\text{sens}^*]_0}{k_{\text{solv}} + k_{\text{tot}}[S]} \left( \frac{k_{O_2}[O_2]}{k_{O_2}[O_2] + k_T[S]} \right) \quad (3)$$

The area (A) under each transient signal is directly proportional to  $[{}^1O_2]$ , and was calculated at varying substrate concentrations. By dividing the relative  ${}^1O_2$  concentration

in the absence of substrate ( $A_0$ ) by the relative  $^1\text{O}_2$  concentration in the presence of substrate ( $A_S$ ) equation 4 is obtained

$$\frac{A_0}{A_S} = \frac{(k_{\text{solv}} + k_{\text{tot}}[\text{S}])(k_{\text{O}_2}[\text{O}_2] + k_{\text{T}}[\text{S}])}{k_{\text{solv}}k_{\text{O}_2}[\text{O}_2]} \quad (4)$$

When  $k_{\text{tot}}[\text{S}] \ll k_{\text{solv}}$ , as is observed in the degradation of the neutral models, equation 4 is simplified to equation 5.

$$\frac{A_0}{A_S} = 1 + \frac{k_{\text{T}}}{k_{\text{O}_2}[\text{O}_2]}[\text{S}] \quad (5)$$

### Sample $^1\text{O}_2$ transient signals obtained by laser flash photolysis

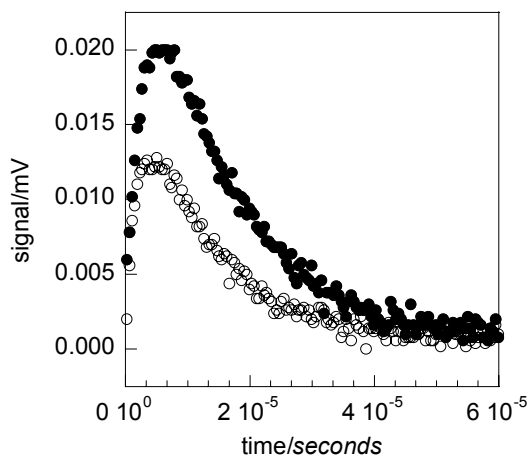

Transient signals showing the growth and decay of  $^1\text{O}_2$  phosphorescence emission determined by laser flash photolysis for dimer **2** (0 mM, ● and 21.6 mM, ○) in EtOH using perinaphthenone as a sensitizer.

- 1 J. H. Espenson, *Chemical Kinetics and Reaction Mechanisms*, McGraw-Hill Inc., New York, 2nd, 1995, 281 pp.
